# Supplementary material for: Mechanistic insights into I 2 O 5 heterogeneous hydrolysis and its role in iodine aerosol growth in pristine and polluted atmospheres
Source: Copernicus journal article supplement (doi:10.5194/acp-26-477-2026), 2026-01-08
Supplement: Supplementary file 1 [file acp-26-477-2026-supplement.pdf]

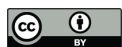

*Supplement of*

## **Mechanistic insights into $\text{I}_2\text{O}_5$ heterogeneous hydrolysis and its role in iodine aerosol growth in pristine and polluted atmospheres**

**Xiucong Deng et al.**

*Correspondence to:* An Ning (anning@bit.edu.cn) and Xiuhui Zhang (zhangxiuhui@bit.edu.cn)

The copyright of individual parts of the supplement might differ from the article licence.

## Table of Contents

### Supplementary Methods

**Unbiased BOMD simulations.**

**Well-tempered metadynamics simulations.**

**Block average analysis.**

**Wave function analysis.**

**Reaction rate constant of the hydrolysis.**

**Table S1.** Reaction rate constants of  $\text{I}_2\text{O}_5$  hydrolysis mediated by  $\text{H}_2\text{O}$ ,  $\text{I}_2\text{O}_5$ ,  $\text{HIO}_3$ , and  $\text{H}_2\text{SO}_4$ .

**Figure S1.** The optimized structures for isomers of  $\text{I}_2\text{O}_5$  at the M06-2X/aug-cc-pVTZ(-PP) level of theory. The relative Gibbs free energies (kcal/mol, comparing to isomer 1) are provided beneath the corresponding isomers.

**Figure S2.** The optimized structures for gas-phase molecules (i.e.  $\text{I}_2\text{O}_5$ ,  $\text{HIO}_3$ ,  $\text{H}_2\text{SO}_4$ , methylamine (MA), dimethylamine (DMA), and trimethylamine (TMA)) at the M06-2X/aug-cc-pVTZ(-PP) level of theory.

**Figure S3.** Mayer bond orders for  $\text{I}_2\text{O}_5$  calculated at the M06-2X/cc-pVTZ(-PP) level of theory.

**Figure S4.** Temperature (black data) and potential energy (red data) evolution during the Born-Oppenheimer molecular dynamics (BOMD) simulations (for the last 30 ps) of the slab containing 128 water molecules in the constant volume and temperature (*NVT*) ensemble at 300 K. The horizontal lines indicate the mean of temperature (red) and potential energy (black). The small standard deviations of energy (<0.002%) and temperature (<4.7%) indicate that the system has reached a statistical equilibrium.

**Figure S5. (a)** Snapshot structures of BOMD simulation for MA-mediated  $\text{I}_2\text{O}_5$  hydrolysis, which illustrate the mechanism for this process. The color coding of different elements is

provided below the BOMD snapshot. **(b)** Time-dependent evolution of key bond distances, with arrows showing the transfer and bonding direction of molecular fragments.

**Figure S6.** **(a)** Snapshot structures of BOMD simulation for TMA-mediated  $\text{I}_2\text{O}_5$  hydrolysis, which illustrate the mechanism for this process. The color coding of different elements is provided below the BOMD snapshot. **(b)** Time-dependent evolution of key bond distances, with arrows showing the transfer and bonding direction of molecular fragments.

**Figure S7.** Details of unbiased simulations. Time evolution of I–O bond distances (I1–O and I2–O within  $\text{I}_2\text{O}_5$ ) mediated by **(a)**  $\text{H}_2\text{O}$ , **(b)**  $\text{HIO}_3$ , **(c)**  $\text{I}_2\text{O}_5$ , and **(d)**  $\text{H}_2\text{SO}_4$ . The color-mapped electron localization function (ELF) for the  $\text{I}_2\text{O}_5$  is illustrated, indicating no apparent tendency for  $\text{I}_2\text{O}_5$  to react with interfacial  $\text{H}_2\text{O}$  to form  $\text{HIO}_3$ .

**Figure S8.** Collective variable (CV) for the initial metadynamics (MetaD) simulations. This CV was set to investigate potential mechanisms for  $\text{I}_2\text{O}_5$  hydrolysis.

**Figure S9.** Collective variable (CV) for the stepwise multi-subphase space metadynamics (SMS-MetaD) simulations. The CV includes all formation (blue) and breaking (red) of bonds during  $\text{I}_2\text{O}_5$  hydrolysis mediated by **(a)**  $\text{H}_2\text{O}$ , **(b)**  $\text{I}_2\text{O}_5$ , **(c)**  $\text{HIO}_3$ , and **(d)**  $\text{H}_2\text{SO}_4$  at the air-water interface. The CV:  $d_{\text{cv}} = d1 + d2 + d3 - d4 - d5 - d6$  was set for four SMS-MetaD simulations.

**Figure S10.** Convergence analysis of the SMS-MetaD simulations for  $\text{I}_2\text{O}_5$  hydrolysis mediated by  $\text{H}_2\text{O}$  at the air-water interface. **(a)** The free energy profiles. **(b)** Time evolution of CV. **(c)** Time evolution of Gaussian height.

**Figure S11.** Convergence analysis of the SMS-MetaD simulations for  $\text{I}_2\text{O}_5$  hydrolysis mediated by  $\text{I}_2\text{O}_5$  at the air-water interface. **(a)** The free energy profiles. **(b)** Time evolution of CV. **(c)** Time evolution of Gaussian height.

**Figure S12.** Convergence analysis of the SMS-MetaD simulations for  $\text{I}_2\text{O}_5$  hydrolysis mediated by  $\text{HIO}_3$  at the air-water interface. **(a)** The free energy profiles. **(b)** Time evolution of CV. **(c)** Time evolution of Gaussian height.

**Figure S13.** Convergence analysis of the SMS-MetaD simulations for  $\text{I}_2\text{O}_5$  hydrolysis mediated by  $\text{H}_2\text{SO}_4$  at the air-water interface. **(a)** The free energy profiles. **(b)** Time evolution of CV. **(c)** Time evolution of Gaussian height.

**Figure S14.** Free energy error as a function of block size within the MetaD simulations of **(a)**  $\text{H}_2\text{O}$ -, **(b)**  $\text{I}_2\text{O}_5$ -, **(c)**  $\text{HIO}_3$ -, and **(d)**  $\text{H}_2\text{SO}_4$ -mediated  $\text{I}_2\text{O}_5$  hydrolysis. The error increases with the block size but reaches a plateau, where the block size was chosen for block analysis (red dashed lines).

**Figure S15.** **(a)** The products are surrounded by interfacial water, and  $x$ ,  $y$ ,  $z$  represent the number of water molecules bound by  $\text{HIO}_3$ ,  $\text{IO}_3^-$ , and  $\text{MAH}^+$  ( $\text{DMAH}^+$  or  $\text{TMAH}^+$ ) through hydrogen bond (HB, bond length  $< 3.5 \text{ \AA}$ , and bond angle  $> 150^\circ$ ). The total number for the products that mediated by **(b)** MA, **(c)** DMA, and **(d)** TMA.

**Figure S16.** The independent gradient model based on Hirshfeld partition (IGMH) analysis for the products of **(a)** MA-, **(b)** DMA-, and **(c)** TMA-mediated hydrolysis. The blue regions indicate notable attraction, such as hydrogen bonds (HBs) and halogen bonds (XBs). And the green regions indicate van der Waals (vdW) interaction, and the red regions indicate repulsion.

**Figure S17.** The electrostatic potential (ESP)-mapped molecular vdW surfaces of the interfacial reaction products mediated by **(a)** MA, **(b)** DMA, and **(c)** TMA. The red regions are the electron-deficient, and the blue regions are electron-rich. The yellow sites (pointed by yellow arrows) indicate the points of local ESP maximum; the cyan sites (pointed by cyan arrows) indicate the points of local ESP minimum.

**Figure S18.** Color-mapped ELF for the iodine products ( $\text{IO}_3^-$  and  $\text{HIO}_3$ ) of  $\text{I}_2\text{O}_5$  hydrolysis mediated by **(a)** MA, **(b)** DMA, and **(c)** TMA. The ELF values (1 to 0) are mapped on a red-green-blue color scale indicated on the right of each subplot.

**Table S2.** Coordinates for all calculated molecules at the M06-2X/aug-cc-pVTZ(-PP) level of theory.

**Table S3.** Coordinates for all calculated isomers of  $\text{I}_2\text{O}_5$  at the M06-2X/aug-cc-pVTZ(-PP) level of theory.

## Supplementary Methods

### Unbiased BOMD simulations.

We first performed unbiased BOMD simulations to check whether the hydrolysis of  $\text{I}_2\text{O}_5$ , mediated by  $\text{H}_2\text{O}$ ,  $\text{HIO}_3$ ,  $\text{I}_2\text{O}_5$ ,  $\text{H}_2\text{SO}_4$ , and amines (MA, DMA, and TMA; see Figures S5 and S6), can occur rapidly by analyzing the dynamic behavior of the pre-reaction complex. The simulation system has been fully relaxed to reach equilibrium (see Figure S4). Among the studied species, amines quickly promote the hydrolysis (see Figure 6);  $\text{H}_2\text{SO}_4$ -mediated reaction occurs only after 20 ps, indicating that it proceeds more slowly than the amine-mediated reaction; while other chemicals indicate no apparent tendency for  $\text{I}_2\text{O}_5$  to react with interfacial  $\text{H}_2\text{O}$  to form  $\text{HIO}_3$  in the simulations within 50 ps (see Figure S7).

### Well-tempered metadynamics simulations.

To investigate the free energy landscape of  $\text{I}_2\text{O}_5$  hydrolysis at the air-water interface, we performed well-tempered metadynamics (MetaD) simulations (Barducci et al., 2008). Initially, the collective variable (CV) was defined as the sum of the lengths of two I–O bonds (according to the bond order calculations, Figure S3 and S8), and the sigma widths and heights of Gaussian hills were set to 0.4 Å and 0.9 kcal mol<sup>-1</sup>, respectively, to explore potential mechanisms. Consequently, we performed MetaD simulations with CV containing all the bonds that are formed or broken during the reaction process (see Figure S9) to describe the reaction and estimate the free energy barrier. Prior to final SMS-MetaD simulations, we identified the upper and lower walls for CV settings through unbiased simulations into the reactant complex (lower wall) and product complex (upper wall). The sigma widths and heights of Gaussian hills were set to 0.1 Å and below 0.1 kcal mol<sup>-1</sup> (refer to the estimated barrier), respectively, for better accuracy in final simulations. The SMS-MetaD simulations were performed respectively in three separate windows. The Gaussian hills were deposited

every 50 steps. All the SMS-MetaD simulations were concluded with convergence analysis (see Figures S10-S13).

### **Block average analysis.**

We reweighted the biased simulations using the metadynamics bias potential obtained at the end of the simulation and assuming a constant bias during the entire course of the simulations (Branduardi et al., 2012). Moreover, block averaging techniques were used to compute the error bars on the estimates for the ensemble average and the free energy obtained from the biased simulations. The error increases with the block size but reaches a plateau, where the block size was chosen for block analysis (see Figure S14). The estimated error bars are exhibited as the pink regions in the free energy profiles.

### **Wave function analysis.**

All wave function analysis for products of  $\text{I}_2\text{O}_5$  hydrolysis was performed using Multiwfn 3.7 code (Lu and Chen, 2012). All the wave function data was calculated at the same level of theory as the unbiased BOMD simulations by CP2K 2022 program (Kühne et al., 2020). We calculated the number of hydrogen bonds (HBs, bond length  $< 3.5 \text{ \AA}$ , and bond angle  $> 150^\circ$ ) between the products and interfacial water (Figure S15). For further insight into the intermolecular interactions, the independent gradient model based on Hirshfeld partition (IGMH) analysis (Lu and Chen, 2022a, b) was performed, replacing the free-state atomic densities involved in the IGM method (Lefebvre et al., 2017) with the atomic densities derived by Hirshfeld partition of actual molecular electron density (Figure S16). Specifically, the  $\text{sign}(\lambda_2)\rho$  values are mapped on the isosurfaces by different colors, where the  $\rho$  is electron density and  $\text{sign}(\lambda_2)$  denotes the sign of the second largest eigenvalue of Hessian matrix of the  $\rho$ . The  $\rho$  is usually positively correlated to interaction strength and  $\text{sign}(\lambda_2)$  is a commonly used indicator for distinguishing whether the interaction is attractive or repulsive (Johnson et al., 2010; Lu and Chen, 2012). Moreover, we performed ESP analysis to identify the vacant

sites of the products (Figure S17). ELF calculations were performed to identify whether a chemical reaction occurs, specifically by identifying the formation of new chemical bonds.

### Reaction rate constant of the hydrolysis.

In this study, the reaction rate constant  $k$  was obtained based on transition state theory (TST). The reaction rate constant is given by the following formula:

$$k^{\text{TST}} = \sigma \frac{k_{\text{B}} T}{h} e^{-\Delta G^{0,\ddagger}/(RT)}$$

where  $\sigma$  is the reaction path degeneracy,  $k_{\text{B}}$  is the Boltzmann constant,  $T$  is the absolute temperature (300 K),  $h$  is the Planck constant,  $R$  is the molar gas constant, and  $\Delta G^{0,\ddagger}$  is the Gibbs free energy change from reactants to the transition state, i.e., the reaction barrier. The values of  $k^{\text{TST}}$  for  $\text{I}_2\text{O}_5$  hydrolysis are shown in Table S1.

**Table S1.** Reaction rate constants of  $\text{I}_2\text{O}_5$  hydrolysis mediated by  $\text{H}_2\text{O}$ ,  $\text{I}_2\text{O}_5$ ,  $\text{HIO}_3$ , and  $\text{H}_2\text{SO}_4$ .

|                         | $\Delta G^{0,\ddagger}$ (error range)/kcal mol <sup>-1</sup> | $k^{\text{TST}}/\text{M}^{-1} \text{s}^{-1}$ | error range of $k^{\text{TST}}/\text{M}^{-1} \text{s}^{-1}$ |
|-------------------------|--------------------------------------------------------------|----------------------------------------------|-------------------------------------------------------------|
| $\text{H}_2\text{O}$    | $9.4 \pm 0.10$                                               | $8.81 \times 10^5$                           | $7.45 \times 10^5$ - $1.04 \times 10^6$                     |
| $\text{I}_2\text{O}_5$  | $3.5 \pm 0.15$                                               | $1.76 \times 10^{10}$                        | $1.37 \times 10^{10}$ - $2.26 \times 10^{10}$               |
| $\text{HIO}_3$          | $4.3 \pm 0.25$                                               | $4.59 \times 10^9$                           | $3.02 \times 10^9$ - $6.99 \times 10^9$                     |
| $\text{H}_2\text{SO}_4$ | $1.3 \pm 0.10$                                               | $7.06 \times 10^{11}$                        | $5.97 \times 10^{11}$ - $8.34 \times 10^{11}$               |





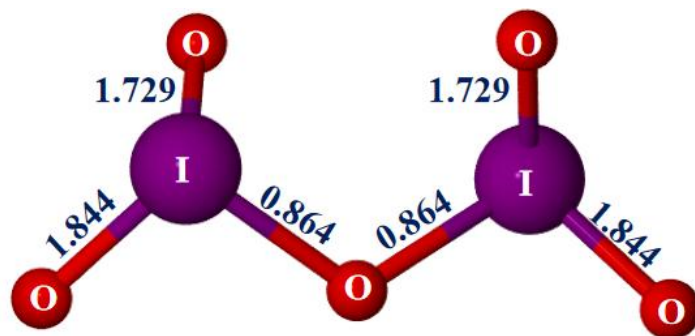

**Figure S3.** Mayer bond orders for  $\text{I}_2\text{O}_5$  calculated at the M06-2X/cc-pVTZ(-PP) level of theory.

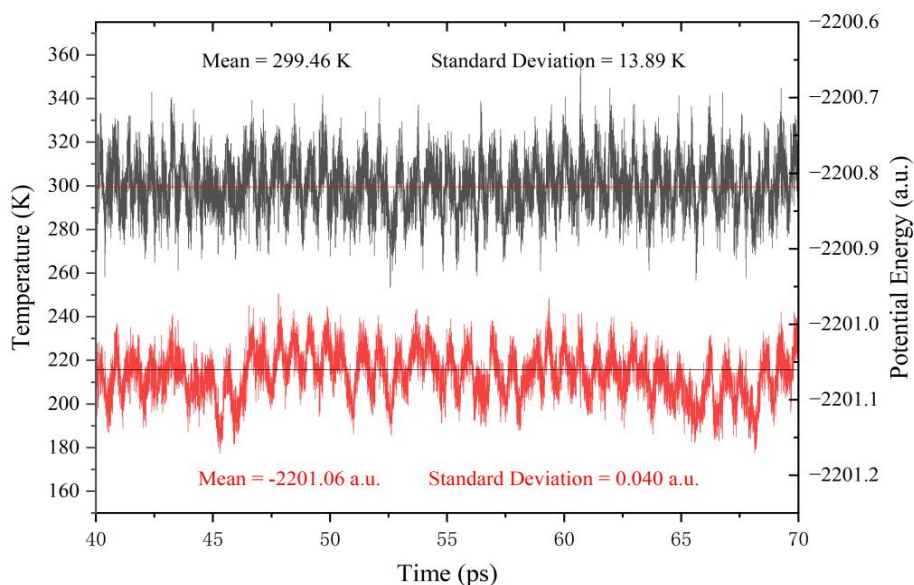

**Figure S4.** Temperature (black data) and potential energy (red data) evolution during the Born-Oppenheimer molecular dynamics (BOMD) simulations (for the last 30 ps) of the slab containing 128 water molecules in the constant volume and temperature ( $NVT$ ) ensemble at 300 K. The horizontal lines indicate the mean of temperature (red) and potential energy (black). The small standard deviations of energy ( $<0.002\%$ ) and temperature ( $<4.7\%$ ) indicate that the system has reached a statistical equilibrium.

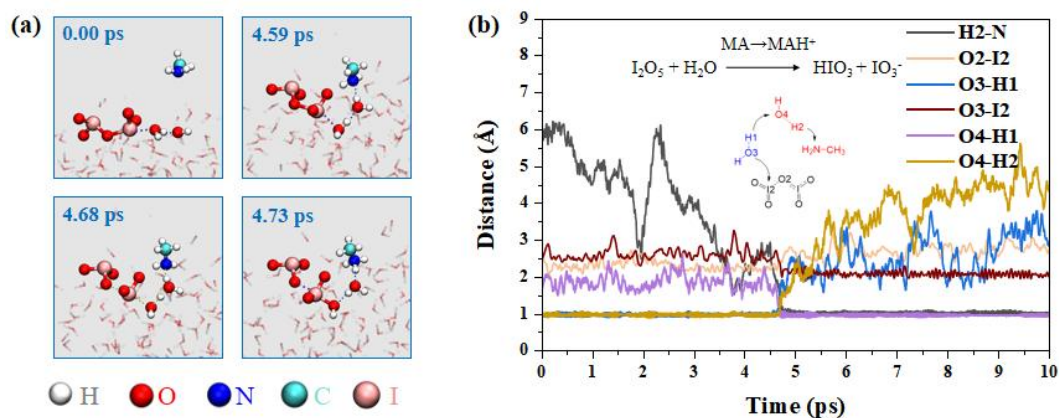

**Figure S5. (a)** Snapshot structures of BOMD simulation for MA-mediated  $\text{I}_2\text{O}_5$  hydrolysis, which illustrate the mechanism for this process. The color coding of different elements is provided below the BOMD snapshot. **(b)** Time-dependent evolution of key bond distances, with arrows showing the transfer and bonding direction of molecular fragments.

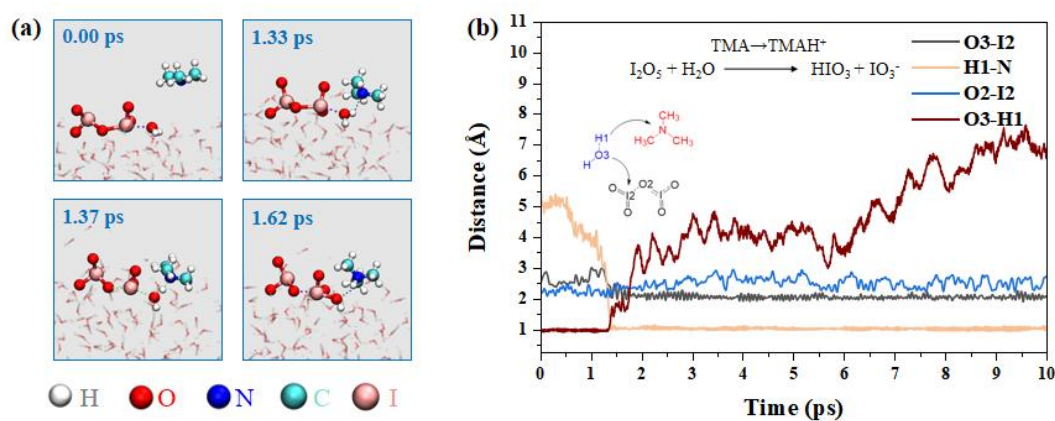

**Figure S6. (a)** Snapshot structures of BOMD simulation for TMA-mediated  $\text{I}_2\text{O}_5$  hydrolysis, which illustrate the mechanism for this process. The color coding of different elements is provided below the BOMD snapshot. **(b)** Time-dependent evolution of key bond distances, with arrows showing the transfer and bonding direction of molecular fragments.

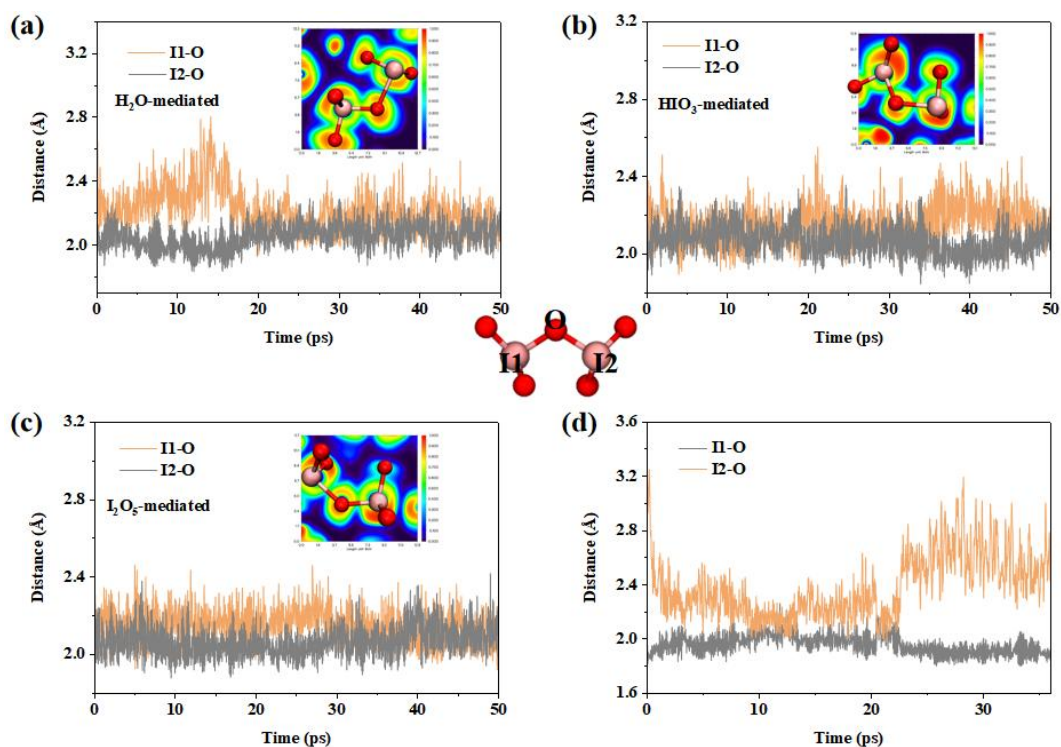

**Figure S7.** Details of unbiased simulations. Time evolution of I-O bond distances (I1-O and I2-O within I<sub>2</sub>O<sub>5</sub>) mediated by (a) H<sub>2</sub>O, (b) HIO<sub>3</sub>, (c) I<sub>2</sub>O<sub>5</sub>, and (d) H<sub>2</sub>SO<sub>4</sub>. The color-mapped electron localization function (ELF) for the I<sub>2</sub>O<sub>5</sub> is illustrated, indicating no apparent tendency for I<sub>2</sub>O<sub>5</sub> to react with interfacial H<sub>2</sub>O to form HIO<sub>3</sub>.

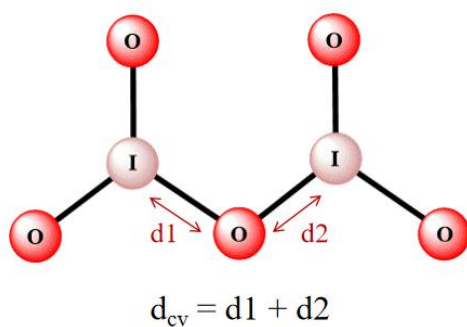

**Figure S8.** Collective variable (CV) for the initial metadynamics (MetaD) simulations. This CV was set to investigate potential mechanisms for I<sub>2</sub>O<sub>5</sub> hydrolysis.

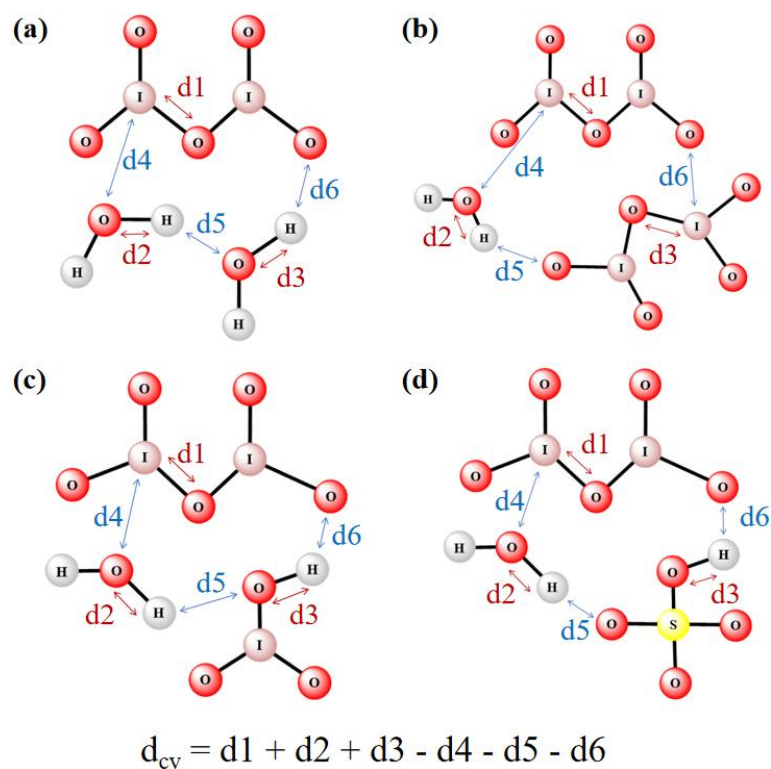

**Figure S9.** Collective variable (CV) for the stepwise multi-subphase space metadynamics (SMS-MetaD) simulations. The CV includes all formation (blue) and breaking (red) of bonds during  $I_2O_5$  hydrolysis mediated by **(a)**  $H_2O$ , **(b)**  $I_2O_5$ , **(c)**  $HIO_3$ , and **(d)**  $H_2SO_4$  at the air-water interface. The CV:  $d_{cv} = d1 + d2 + d3 - d4 - d5 - d6$  was set for four SMS-MetaD simulations.

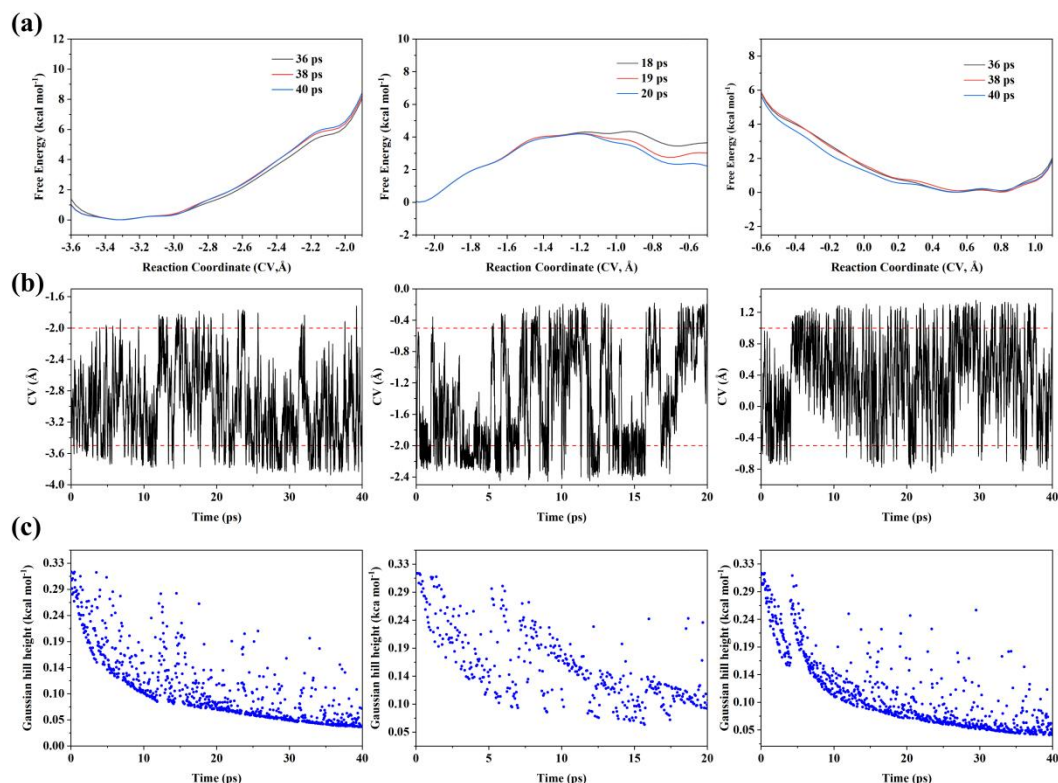

**Figure S10.** Convergence analysis of the SMS-MetaD simulations for  $\text{I}_2\text{O}_5$  hydrolysis mediated by  $\text{H}_2\text{O}$  at the air-water interface. **(a)** The free energy profiles. **(b)** Time evolution of CV. **(c)** Time evolution of Gaussian height.

The SMS-MetaD simulations were carried out in three separate windows. Minor variation in the free energy profiles during the final few picoseconds indicates convergence; the CV fluctuates over whole restrained scale (the red dashed lines indicate the upper and lower limits of the windows), indicating the convergence of the CV. The Gaussian height is decreasing to a minimum. Notably, in the beginning the value of the Gaussian height is higher than the initial height we set due to the pre-factor. The free energy profiles and time evolution of CV indicate the convergence reached. The decreasing Gaussian height indicates a conclusion for simulations. The similar results are observed in the following Figures S11-S13, which involve the reactions mediated by  $\text{I}_2\text{O}_5$ ,  $\text{HIO}_3$  and  $\text{H}_2\text{SO}_4$ .



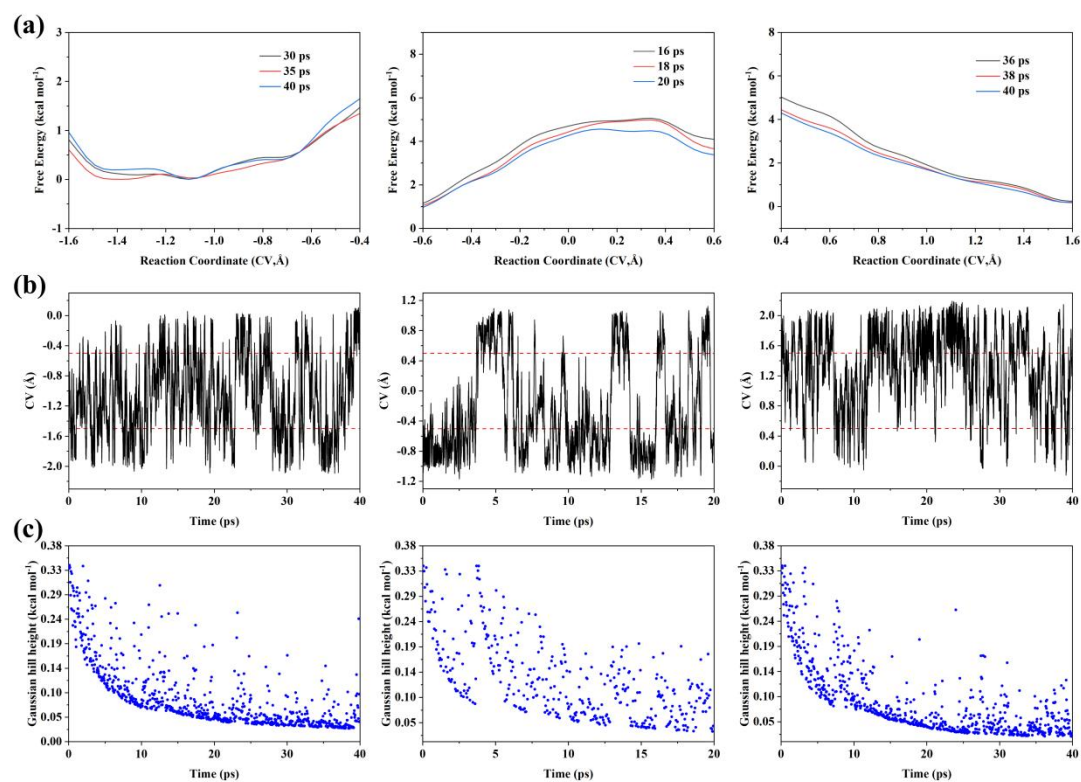

**Figure S11.** Convergence analysis of the SMS-MetaD simulations for  $\text{I}_2\text{O}_5$  hydrolysis mediated by  $\text{I}_2\text{O}_5$  at the air-water interface. **(a)** The free energy profiles. **(b)** Time evolution of CV. **(c)** Time evolution of Gaussian height.

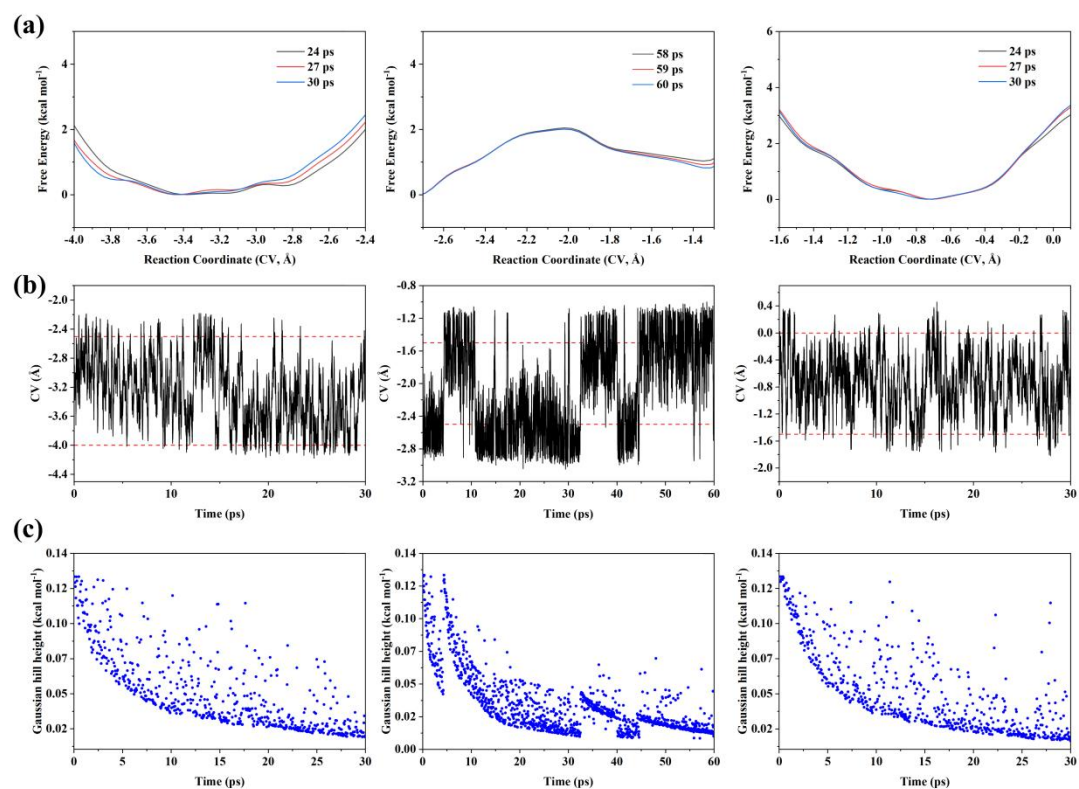

**Figure S12.** Convergence analysis of the SMS-MetaD simulations for  $\text{I}_2\text{O}_5$  hydrolysis mediated by  $\text{HIO}_3$  at the air-water interface. **(a)** The free energy profiles. **(b)** Time evolution of CV. **(c)** Time evolution of Gaussian height.



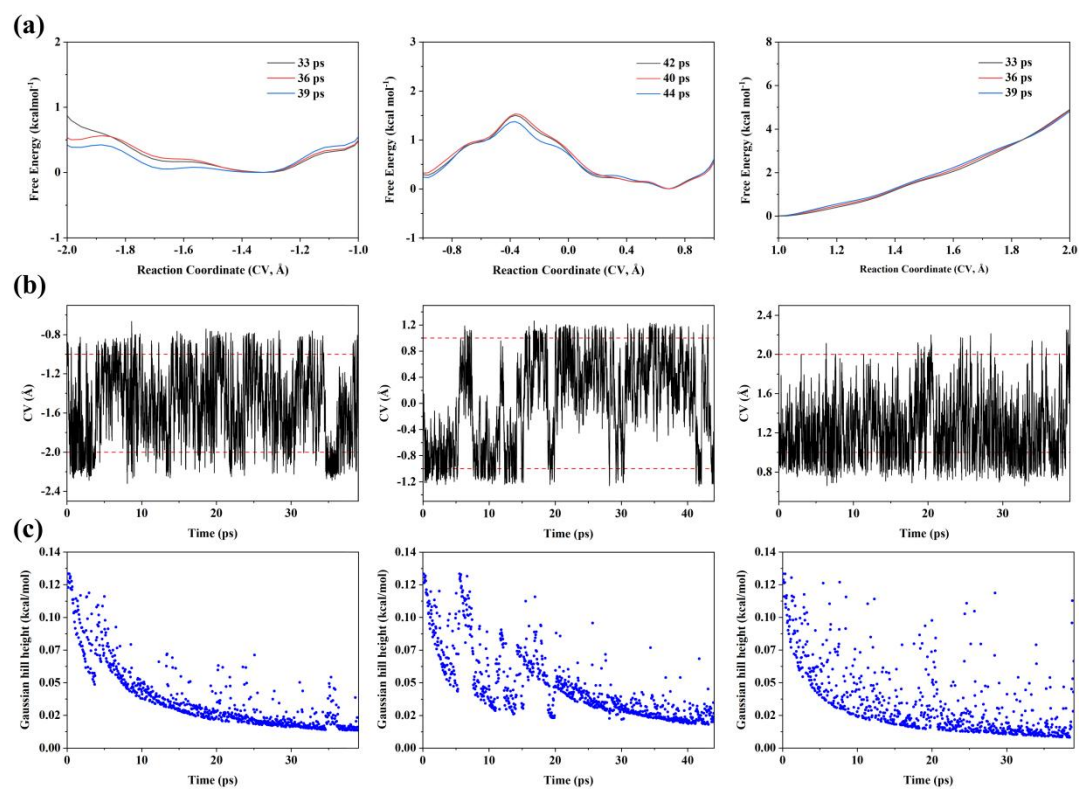

**Figure S13.** Convergence analysis of the SMS-MetaD simulations for  $\text{I}_2\text{O}_5$  hydrolysis mediated by  $\text{H}_2\text{SO}_4$  at the air-water interface. **(a)** The free energy profiles. **(b)** Time evolution of CV. **(c)** Time evolution of Gaussian height.

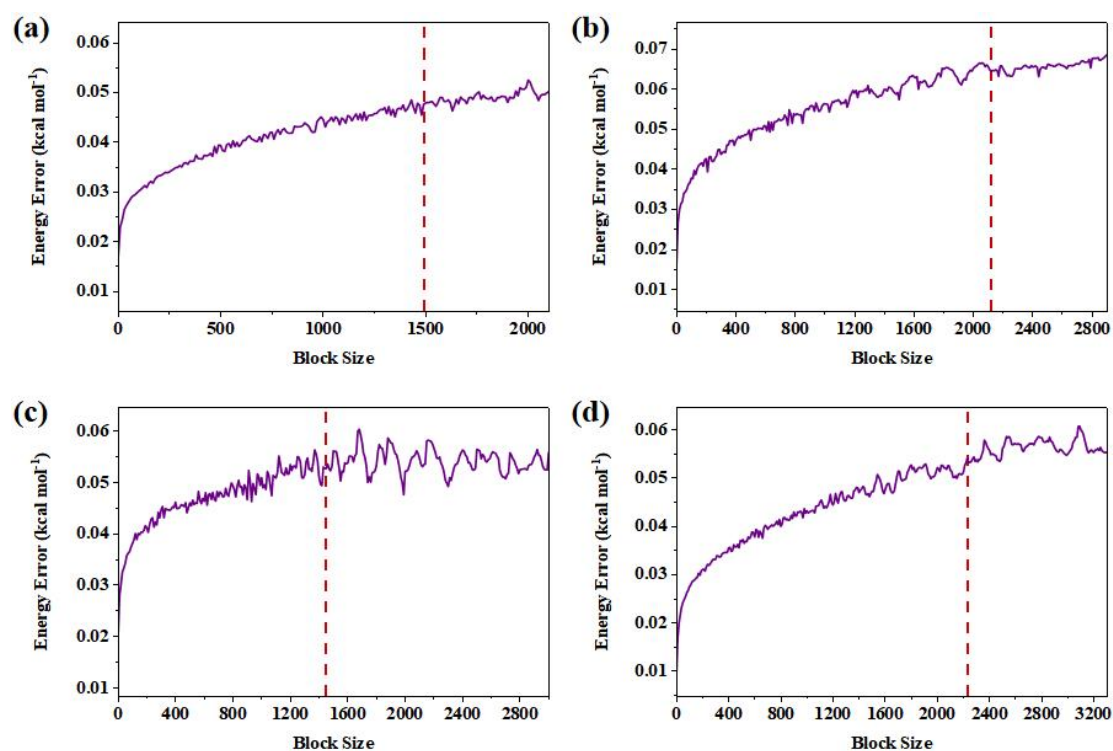

**Figure S14.** Free energy error as a function of block size within the MetaD simulations of (a) H<sub>2</sub>O-, (b) I<sub>2</sub>O<sub>5</sub>-, (c) HIO<sub>3</sub>-, and (d) H<sub>2</sub>SO<sub>4</sub>-mediated I<sub>2</sub>O<sub>5</sub> hydrolysis. The error increases with the block size but reaches a plateau, where the block size was chosen for block analysis (red dashed lines).

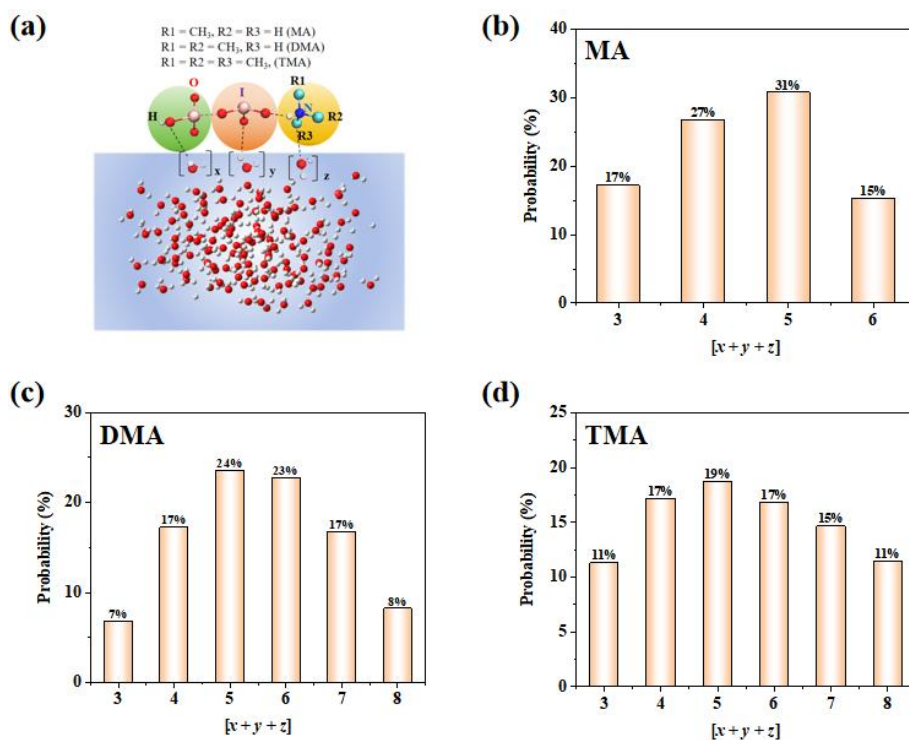

**Figure S15.** (a) The products are surrounded by interfacial water, and  $x$ ,  $y$ ,  $z$  represent the number of water molecules bound by  $\text{HIO}_3$ ,  $\text{IO}_3^-$ , and  $\text{MAH}^+$  ( $\text{DMAH}^+$  or  $\text{TMAH}^+$ ) through hydrogen bond (HB, bond length < 3.5 Å, and bond angle > 150°). The total number for the products that mediated by (b) MA, (c) DMA, and (d) TMA.

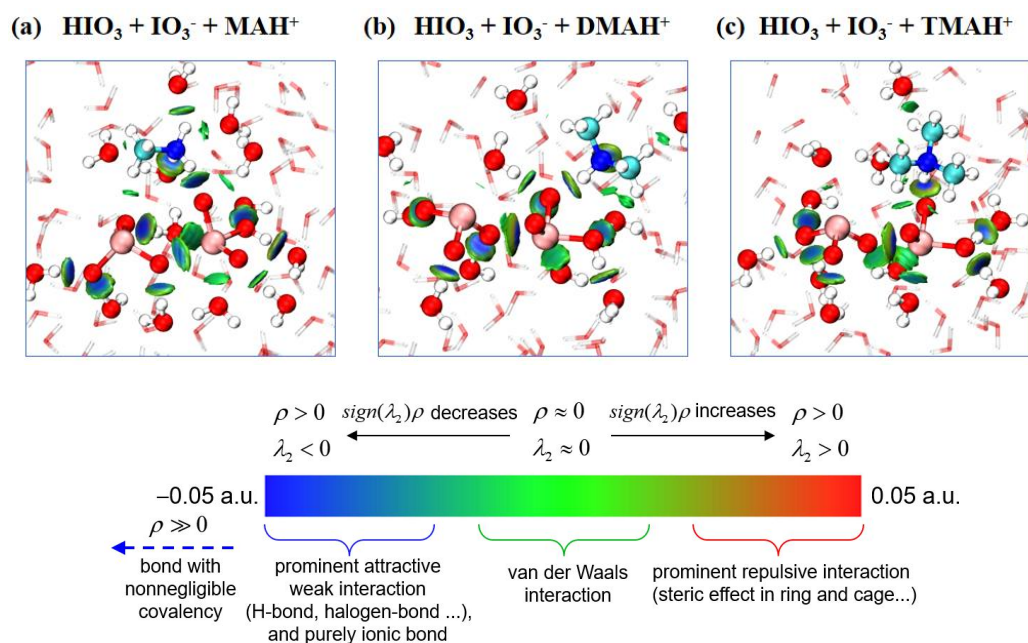

**Figure S16.** The independent gradient model based on Hirshfeld partition (IGMH) analysis for the products of (a) MA-, (b) DMA-, and (c) TMA-mediated hydrolysis. The blue regions indicate notable attraction, such as hydrogen bonds (HBs) and halogen bonds (XBs). And the green regions indicate van der Waals (vdW) interaction, and the red regions indicate repulsion.

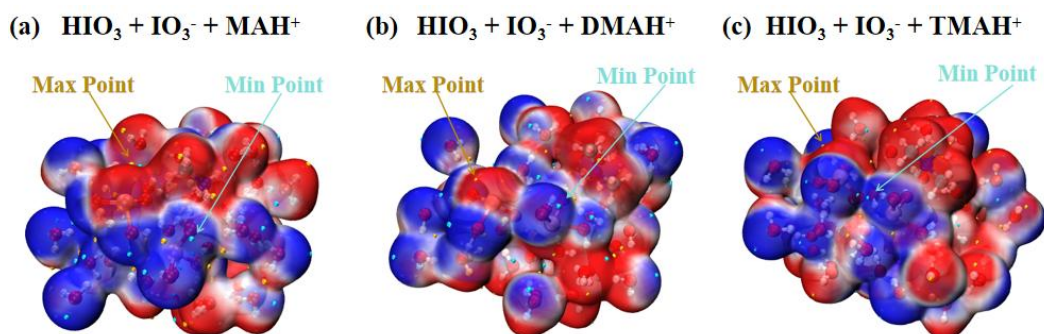

**Figure S17.** The electrostatic potential (ESP)-mapped molecular vdW surfaces of the interfacial reaction products mediated by (a) MA, (b) DMA, and (c) TMA. The red regions are electron-deficient, and the blue regions are electron-rich. The yellow sites (pointed by yellow arrows) indicate the points of local ESP maximum; the cyan sites (pointed by cyan arrows) indicate the points of local ESP minimum.

For more distinct visualization, only the electrostatic potential (ESP) analysis of the products and surrounding water molecules are shown in Figure S17. The points of local maximum electrostatic potential (near the I within  $\text{IO}_3^-$  and  $\text{HIO}_3$ ) are the expected unoccupied donor sites for XB and the points of local minimum electrostatic potential (near the O within  $\text{IO}_3^-$  and  $\text{HIO}_3$ ) are the expected unoccupied acceptor sites for HB and XB. The unoccupied sites potentially further uptake gaseous species, thereby promoting aerosol growth.

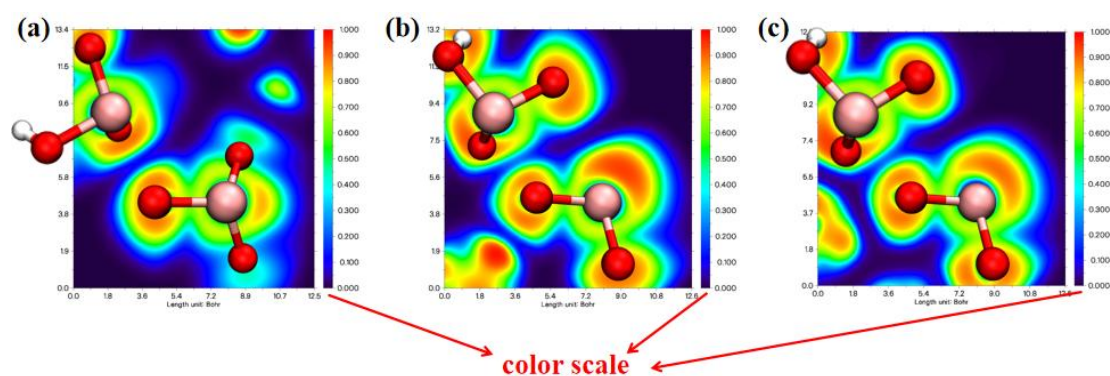

**Figure S18.** Color-mapped ELF for the iodine products ( $\text{IO}_3^-$  and  $\text{HIO}_3$ ) of  $\text{I}_2\text{O}_5$  hydrolysis mediated by (a) MA, (b) DMA, and (c) TMA. The ELF values (1 to 0) are mapped on a red-green-blue color scale indicated on the right of each subplot.

**Table S2.** Coordinates for all calculated molecules at the M06-2X/aug-cc-pVTZ(-PP) level of theory.

| $\text{I}_2\text{O}_5$ (Isomer 1) |           |           |           |
|-----------------------------------|-----------|-----------|-----------|
| O                                 | -0.000013 | -0.988788 | 0.000159  |
| I                                 | 1.641204  | 0.055287  | -0.225857 |
| I                                 | -1.641235 | 0.055311  | 0.225852  |
| O                                 | 2.800249  | -1.108887 | 0.404898  |
| O                                 | 1.270721  | 1.236952  | 1.040258  |
| O                                 | -2.800236 | -1.108859 | -0.404989 |
| O                                 | -1.270515 | 1.236874  | -1.040296 |
| $\text{HIO}_3$                    |           |           |           |
| I                                 | -0.096935 | 0.013334  | -0.244580 |
| O                                 | -0.289743 | 1.559142  | 0.594271  |
| O                                 | -1.014657 | -1.204758 | 0.647080  |
| O                                 | 1.713186  | -0.419126 | 0.233680  |
| H                                 | 1.867280  | -0.188774 | 1.162521  |

| H <sub>2</sub> SO <sub>4</sub> |           |           |           |
|--------------------------------|-----------|-----------|-----------|
| S                              | 0.000001  | -0.000003 | 0.154681  |
| O                              | 0.670149  | 1.064615  | 0.826194  |
| O                              | 1.023747  | -0.686964 | -0.845067 |
| H                              | 1.708834  | -0.047610 | -1.086390 |
| O                              | -1.023744 | 0.686990  | -0.845052 |
| H                              | -1.708821 | 0.047636  | -1.086403 |
| O                              | -0.670155 | -1.064638 | 0.826162  |
| MA                             |           |           |           |
| N                              | 0.747530  | 0.000000  | -0.120845 |
| H                              | 1.149839  | -0.811832 | 0.328231  |
| H                              | 1.149839  | 0.811832  | 0.328231  |
| C                              | -0.706161 | 0.000000  | 0.017785  |
| H                              | -1.112738 | 0.876800  | -0.483829 |
| H                              | -1.112739 | -0.876799 | -0.483831 |
| H                              | -1.069944 | -0.000001 | 1.050407  |
| DMA                            |           |           |           |
| N                              | 0.000000  | 0.568475  | -0.148304 |
| H                              | 0.000001  | 1.336588  | 0.508868  |
| C                              | -1.204665 | -0.224024 | 0.020309  |
| H                              | -2.083499 | 0.413833  | -0.056533 |
| H                              | -1.258202 | -0.965087 | -0.778566 |
| H                              | -1.244160 | -0.762560 | 0.977876  |
| C                              | 1.204665  | -0.224024 | 0.020309  |
| H                              | 1.258206  | -0.965080 | -0.778573 |

|     |           |           |           |
|-----|-----------|-----------|-----------|
| H   | 2.083499  | 0.413834  | -0.056523 |
| H   | 1.244156  | -0.762568 | 0.977871  |
| TMA |           |           |           |
| N   | 0.000000  | 0.000009  | -0.389205 |
| C   | 1.195212  | 0.683133  | 0.062542  |
| H   | 2.079355  | 0.170403  | -0.315039 |
| H   | 1.202277  | 1.705136  | -0.315089 |
| H   | 1.260883  | 0.720681  | 1.163047  |
| C   | -1.189213 | 0.693506  | 0.062541  |
| H   | -1.187224 | 1.715614  | -0.314877 |
| H   | -2.077799 | 0.188704  | -0.315260 |
| H   | -1.254710 | 0.731401  | 1.163041  |
| C   | -0.005990 | -1.376629 | 0.062538  |
| H   | -0.892218 | -1.885891 | -0.314819 |
| H   | 0.875409  | -1.893854 | -0.315333 |
| H   | -0.006029 | -1.452314 | 1.163040  |

**Table S3.** Coordinates for all calculated isomers of I<sub>2</sub>O<sub>5</sub> at the M06-2X/aug-cc-pVTZ(-PP) level of theory.

|          |           |           |           |
|----------|-----------|-----------|-----------|
| Isomer 1 |           |           |           |
| O        | -0.000013 | -0.988788 | 0.000159  |
| I        | 1.641204  | 0.055287  | -0.225857 |
| I        | -1.641235 | 0.055311  | 0.225852  |
| O        | 2.800249  | -1.108887 | 0.404898  |
| O        | 1.270721  | 1.236952  | 1.040258  |



|          |           |           |           |
|----------|-----------|-----------|-----------|
| O        | -2.800236 | -1.108859 | -0.404989 |
| O        | -1.270515 | 1.236874  | -1.040296 |
| <hr/>    |           |           |           |
| Isomer 2 |           |           |           |
| <hr/>    |           |           |           |
| I        | 0.000000  | 1.656872  | -0.054736 |
| O        | 0.000000  | 0.000000  | 0.989073  |
| I        | 0.000000  | -1.656872 | -0.054736 |
| O        | -0.789433 | -2.716528 | 1.107431  |
| O        | 1.199506  | 1.113881  | -1.239338 |
| O        | 0.789433  | 2.716528  | 1.107431  |
| O        | -1.199506 | -1.113881 | -1.239338 |
| <hr/>    |           |           |           |
| Isomer 3 |           |           |           |
| <hr/>    |           |           |           |
| I        | -1.769146 | -0.160199 | -0.157389 |
| O        | -0.000002 | 0.000007  | -0.980462 |
| I        | 1.769147  | 0.160192  | -0.157396 |
| O        | -2.140622 | 1.528856  | 0.182916  |
| O        | -1.400607 | -0.996020 | 1.350040  |
| O        | 1.400657  | 0.996070  | 1.350017  |
| O        | 2.140569  | -1.528872 | 0.182940  |
| <hr/>    |           |           |           |

## Supplementary Reference

- Barducci, A., Bussi, G., and Parrinello, M.: Well-Tempered Metadynamics: A Smoothly Converging and Tunable Free-Energy Method, *Phys. Rev. Lett.*, 100, 020603, <https://doi.org/10.1103/PhysRevLett.100.020603>, 2008.
- Branduardi, D., Bussi, G., and Parrinello, M.: Metadynamics with Adaptive Gaussians, *J. Chem. Theory Comput.*, 8, 2247–2254, <https://doi.org/10.1021/ct3002464>, 2012.
- Johnson, E. R., Keinan, S., Mori-Sánchez, P., Contreras-García, J., Cohen, A. J., and Yang, W.: Revealing Noncovalent Interactions, *J. Am. Chem. Soc.*, 132, 6498–6506, <https://doi.org/10.1021/ja100936w>, 2010.
- Kühne, T. D., Iannuzzi, M., Del Ben, M., Rybkin, V. V., Seewald, P., Stein, F., Laino, T., Khaliullin, R. Z., Schütt, O., Schiffmann, F., Golze, D., Wilhelm, J., Chulkov, S., Bani-Hashemian, M. H., Weber, V., Borštnik, U., TAILLEFUMIER, M., Jakobovits, A. S., Lazzaro, A., Pabst, H., Müller, T., Schade, R., Guidon, M., Andermatt, S., Holmberg, N., Schenter, G. K., Hehn, A., Bussy, A., Belleflamme, F., Tabacchi, G., Glöß, A., Lass, M., Bethune, I., Mundy, C. J., Plessl, C., Watkins, M., VandeVondele, J., Krack, M., and Hutter, J.: CP2K: An electronic structure and molecular dynamics software package - Quickstep: Efficient and accurate electronic structure calculations, *J. Chem. Phys.*, 152, 194103, <https://doi.org/10.1063/5.0007045>, 2020.
- Lefebvre, C., Rubez, G., Khartabil, H., Boisson, J.-C., Contreras-García, J., and Hénon, E.: Accurately extracting the signature of intermolecular interactions present in the NCI plot of the reduced density gradient versus electron density, *Phys. Chem. Chem. Phys.*, 19, 17928–17936, <https://doi.org/10.1039/C7CP02110K>, 2017.
- Lu, T. and Chen, F.: Multiwfn: A multifunctional wavefunction analyzer, *J. Comput. Chem.*, 33, 580–592, <https://doi.org/10.1002/jcc.22885>, 2012.
- Lu, T. and Chen, Q.: Independent gradient model based on Hirshfeld partition: A new method for visual study of interactions in chemical systems, *J. Comput. Chem.*, 43, 539–555, <https://doi.org/10.1002/jcc.26812>, 2022a.
- Lu, T. and Chen, Q.: Erratum to “Independent gradient model based on Hirshfeld partition: A new method for visual study of interactions in chemical systems,” <https://doi.org/10.26434/chemrxiv-2022-g1m34>, 26 October 2022b.
